# Supplementary material
Source: HighWire-hosted journal article supplement (https://bmjopen.bmj.com/content/10/6/e034458)
Supplement: inline-supplementary-material-1 [file inline-supplementary-material-1.pdf]

Supplementary Table S1: Definitions of the variables

| No. | Variables<br>(Operational definition)    | Description                                                                                                                                                                                                                  | Type of variable |
|-----|------------------------------------------|------------------------------------------------------------------------------------------------------------------------------------------------------------------------------------------------------------------------------|------------------|
| 1   | Antenatal code                           | <ul style="list-style-type: none"> <li>• White</li> <li>• Green</li> <li>• Yellow</li> <li>• Red</li> </ul>                                                                                                                  | Categorical      |
| 2   | Age                                      | Maternal age in completed years                                                                                                                                                                                              | Interval         |
| 3   | Ethnicity<br>-according to paternal side | <ul style="list-style-type: none"> <li>• Malay</li> <li>• Chinese</li> <li>• Indian</li> <li>• Others</li> </ul>                                                                                                             | Categorical      |
| 4   | Religion                                 | <ul style="list-style-type: none"> <li>• Islam</li> <li>• Buddha</li> <li>• Hindu</li> <li>• Christian</li> <li>• Others</li> </ul>                                                                                          | Categorical      |
| 5   | Marital status                           | <ul style="list-style-type: none"> <li>• Single</li> <li>• Married</li> <li>• Divorced</li> <li>• Widow</li> </ul>                                                                                                           | Categorical      |
| 6   | Education level<br>- highest attained    | <ul style="list-style-type: none"> <li>• Primary education</li> <li>• Secondary education</li> <li>• Diploma/ Technical studies</li> <li>• Tertiary education</li> <li>• Never been to school /No schooling</li> </ul>       | Categorical      |
| 7   | Occupation                               | <ul style="list-style-type: none"> <li>• Unemployed</li> <li>• Routine and manual occupations</li> <li>• Intermediate occupations</li> <li>• Higher level: managerial, administrative or professional</li> </ul>             | Categorical      |
| 8   | Duration of marriage                     | Duration of marriage in completed years                                                                                                                                                                                      | Interval         |
| 9   | Husband occupation                       | <ul style="list-style-type: none"> <li>• Unemployed</li> <li>• Routine and manual occupations</li> <li>• Intermediate occupations</li> <li>• Higher level: managerial, administrative or professional occupations</li> </ul> | Categorical      |
| 10  | Combined household income                | <ul style="list-style-type: none"> <li>• &lt;RM1000</li> <li>• RM1000-RM5000</li> <li>• RM5000-RM10,000</li> <li>• &gt;RM10,000</li> </ul>                                                                                   | Categorical      |

|    |                                                                                          |                                                                                                                            |             |
|----|------------------------------------------------------------------------------------------|----------------------------------------------------------------------------------------------------------------------------|-------------|
| 11 | Smoking status<br>-all types                                                             | <ul style="list-style-type: none"> <li>• Yes, intensity – no of stick(s)</li> <li>• No</li> <li>• Ex-smoker</li> </ul>     | Categorical |
| 12 | Alcohol status<br>-all types                                                             | <ul style="list-style-type: none"> <li>• Yes</li> <li>• No</li> <li>• Currently stopped</li> </ul>                         | Categorical |
| 13 | Husband practicing polygamy                                                              | <ul style="list-style-type: none"> <li>• Yes</li> <li>• No</li> </ul>                                                      | Categorical |
| 14 | If polygamy, wife no                                                                     | <ul style="list-style-type: none"> <li>• 1</li> <li>• 2</li> <li>• 3</li> <li>• 4</li> </ul>                               | Categorical |
| 15 | No of children                                                                           | <ul style="list-style-type: none"> <li>• 0</li> <li>• 1</li> <li>• 2</li> <li>• 3</li> <li>• 4</li> <li>• &gt;5</li> </ul> | Ordinal     |
| 16 | Pre-pregnancy baby gender preference                                                     | <ul style="list-style-type: none"> <li>• Male</li> <li>• Female</li> <li>• No preference</li> </ul>                        | Categorical |
| 17 | Antenatal care                                                                           | <ul style="list-style-type: none"> <li>• Government</li> <li>• Private</li> <li>• None</li> </ul>                          | Categorical |
| 18 | Planned pregnancy<br>-Is the current pregnancy planned and not unexpected?               | <ul style="list-style-type: none"> <li>• Yes</li> <li>• No</li> </ul>                                                      | Categorical |
| 19 | Satisfied with marriage<br>-self-report                                                  | <ul style="list-style-type: none"> <li>• Yes</li> <li>• No</li> </ul>                                                      | Categorical |
| 20 | Marital problems<br>-respondent's own perception of her marriage                         | <ul style="list-style-type: none"> <li>• Yes</li> <li>• No</li> </ul>                                                      | Categorical |
| 21 | Period of marital problems                                                               | <ul style="list-style-type: none"> <li>• Before child delivery</li> <li>• After child delivery</li> </ul>                  | Categorical |
| 22 | Stable relationship with husband<br>- self-report                                        | <ul style="list-style-type: none"> <li>• Yes</li> <li>• No</li> </ul>                                                      | Categorical |
| 23 | Domestic violence<br>-Self-report of physical or emotional abuse at home before marriage | <ul style="list-style-type: none"> <li>• Yes</li> <li>• No</li> </ul>                                                      | Categorical |
| 24 | Domestic violence in this marriage and during pregnancy                                  | <ul style="list-style-type: none"> <li>• Yes</li> <li>• No</li> </ul>                                                      | Categorical |

|    |                                                                                                                                                    |                                                                       |             |
|----|----------------------------------------------------------------------------------------------------------------------------------------------------|-----------------------------------------------------------------------|-------------|
| 25 | Relationship with parents<br>-respondent's own perception of the relationship between the mother and her parents                                   | <ul style="list-style-type: none"> <li>• Yes</li> <li>• No</li> </ul> | Categorical |
| 26 | Relationship with parent in law<br>- respondent's own perception of the relationship between her and her parent-in-law                             | <ul style="list-style-type: none"> <li>• Yes</li> <li>• No</li> </ul> | Categorical |
| 27 | Underlying medical illness before pregnancy<br>-Any underlying diabetes, hypertension, asthma or any other chronic illnesses                       | <ul style="list-style-type: none"> <li>• Yes</li> <li>• No</li> </ul> | Categorical |
| 28 | Underlying medical illness during pregnancy<br>-Hypertension, gestational diabetes etc.                                                            | <ul style="list-style-type: none"> <li>• Yes</li> <li>• No</li> </ul> | Categorical |
| 29 | History of miscarriage<br>-any history of abortion before 22 weeks in previous pregnancy                                                           | <ul style="list-style-type: none"> <li>• Yes</li> <li>• No</li> </ul> | Categorical |
| 30 | Underlying mental illness<br>-Diagnosed of having mental illness prior to pregnancy                                                                | <ul style="list-style-type: none"> <li>• Yes</li> <li>• No</li> </ul> | Categorical |
| 31 | History of mental illness during pregnancy<br>-Diagnosed of having mental illness during her current pregnancy                                     | <ul style="list-style-type: none"> <li>• Yes</li> <li>• No</li> </ul> | Categorical |
| 32 | History of mental illness during postpartum period<br>-Diagnosed of having mental illness during her postpartum period                             | <ul style="list-style-type: none"> <li>• Yes</li> <li>• No</li> </ul> | Categorical |
| 33 | Family history of mental illness<br>-Is there any parents of 1 <sup>st</sup> degree relative being diagnosed of having mental illness?             | <ul style="list-style-type: none"> <li>• Yes</li> <li>• No</li> </ul> | Categorical |
| 34 | Inadequate help from spouse during postpartum period<br>- respondent's own perception of inadequate support during postpartum period               | <ul style="list-style-type: none"> <li>• Yes</li> <li>• No</li> </ul> | Categorical |
| 35 | Inadequate help from other family members during postpartum period<br>- respondent's own perception of inadequate support during postpartum period | <ul style="list-style-type: none"> <li>• Yes</li> <li>• No</li> </ul> | Categorical |
| 36 | Inadequate help from others during postpartum period                                                                                               | <ul style="list-style-type: none"> <li>• Yes</li> </ul>               | Categorical |

|    |                                                                                                                                                                                                                  |                                                                                                                                                               |             |
|----|------------------------------------------------------------------------------------------------------------------------------------------------------------------------------------------------------------------|---------------------------------------------------------------------------------------------------------------------------------------------------------------|-------------|
|    | - respondent's own perception of inadequate support during postpartum period                                                                                                                                     | <ul style="list-style-type: none"> <li>• No</li> </ul>                                                                                                        |             |
| 37 | Inability to establish breast feeding<br>-the inability to exclusively breast feed, requiring top up using formula milk                                                                                          | <ul style="list-style-type: none"> <li>• Yes</li> <li>• No</li> </ul>                                                                                         | Categorical |
| 38 | No confidence to care for the child<br>-the inability of the mother to care for the baby, thus being dependent on others                                                                                         | <ul style="list-style-type: none"> <li>• Yes</li> <li>• No</li> </ul>                                                                                         | Categorical |
| 39 | Experienced stressful life events<br>-any recent events, occurred during antenatal and postpartum period such as financial burden, passing of loved ones or events that are perceived as stressful by respondent | <ul style="list-style-type: none"> <li>• Yes</li> <li>• No</li> </ul>                                                                                         | Categorical |
| 40 | Any cultural taboos observed during postnatal care that contribute to mother's stress                                                                                                                            | <ul style="list-style-type: none"> <li>• Yes</li> <li>• No</li> </ul>                                                                                         | Categorical |
| 41 | With whom respondent observed postnatal care during confinement                                                                                                                                                  | <ul style="list-style-type: none"> <li>• Parents</li> <li>• Parents in law</li> <li>• Husband</li> <li>• Confinement lady/ centre</li> <li>• Alone</li> </ul> | Categorical |
| 42 | Inadequate help to take care of new born at night<br>- self-report                                                                                                                                               | <ul style="list-style-type: none"> <li>• Yes</li> <li>• No</li> </ul>                                                                                         | Categorical |
| 43 | Inadequate sleep/rest<br>- respondent's own perception of inadequate sleep or rest during postpartum period                                                                                                      | <ul style="list-style-type: none"> <li>• Yes</li> <li>• No</li> </ul>                                                                                         | Categorical |
| 44 | Dissatisfied with body weight and appearance post delivery<br>- respondent's own perception on the satisfaction of her body weight and appearance post delivery                                                  | <ul style="list-style-type: none"> <li>• Yes</li> <li>• No</li> </ul>                                                                                         | Categorical |
| 45 | Intrapartum experience<br>- respondent's own perception of having bad experiences during labour. E.g.: unbearable pain                                                                                           | <ul style="list-style-type: none"> <li>• Yes</li> <li>• No</li> </ul>                                                                                         | Categorical |
| 46 | Mode of delivery                                                                                                                                                                                                 | <ul style="list-style-type: none"> <li>• SVD</li> </ul>                                                                                                       | Categorical |

|    |                                                                                                                                           |                                                                                                                                                                                                                                                                                                                                                                                                                                                                                                                                                                                              |                                                       |
|----|-------------------------------------------------------------------------------------------------------------------------------------------|----------------------------------------------------------------------------------------------------------------------------------------------------------------------------------------------------------------------------------------------------------------------------------------------------------------------------------------------------------------------------------------------------------------------------------------------------------------------------------------------------------------------------------------------------------------------------------------------|-------------------------------------------------------|
|    |                                                                                                                                           | <ul style="list-style-type: none"> <li>• Instrumental delivery</li> <li>• Planned caesarean section</li> <li>• Emergency caesarean section</li> </ul>                                                                                                                                                                                                                                                                                                                                                                                                                                        |                                                       |
| 47 | Postnatal complication<br>-experienced wound pain,<br>wound breakdown, readmission<br>to ward                                             | <ul style="list-style-type: none"> <li>• Yes</li> <li>• No</li> <li>•</li> </ul>                                                                                                                                                                                                                                                                                                                                                                                                                                                                                                             | Categorical                                           |
| 48 | Type of complication                                                                                                                      | List complication                                                                                                                                                                                                                                                                                                                                                                                                                                                                                                                                                                            | Categorical                                           |
| 49 | Readmission after discharge<br>during postpartum period                                                                                   | <ul style="list-style-type: none"> <li>• Yes</li> <li>• No</li> </ul>                                                                                                                                                                                                                                                                                                                                                                                                                                                                                                                        | Categorical                                           |
| 50 | Outcome of the baby                                                                                                                       | <ul style="list-style-type: none"> <li>• Alive</li> <li>• Gender</li> <li>• Birth weight</li> <li>• Twins</li> <li>• Gestational weight</li> <li>• Admission to ward</li> <li>• Medical complication</li> </ul>                                                                                                                                                                                                                                                                                                                                                                              | Categorical                                           |
| 51 | Edinburgh Postpartum<br>Depression scale scoring<br>(Less than 11 – no postpartum<br>depression<br>11 or more – postpartum<br>depression) | <p>Total score (range 0 - 30)</p> <ul style="list-style-type: none"> <li>• Less than 11 – no postpartum<br/>depression</li> <li>• 11 or more – postpartum<br/>depression</li> </ul>                                                                                                                                                                                                                                                                                                                                                                                                          | Interval<br><br>Categorical                           |
| 52 | Depression anxiety stress scale<br>(DASS) scoring                                                                                         | <p>Total scores (range 0-21)</p> <ul style="list-style-type: none"> <li>• Depression <ul style="list-style-type: none"> <li>- Mild: 6-7</li> <li>- Moderate: 8-10</li> <li>- Severe: 11-14</li> <li>- Very severe: 15 to 21</li> </ul> </li> <li>• Anxiety <ul style="list-style-type: none"> <li>- Mild: 5-6</li> <li>- Moderate: 7-8</li> <li>- Severe: 9-10</li> <li>- Very severe: 11 to 21</li> </ul> </li> <li>• Stress <ul style="list-style-type: none"> <li>- Mild: 8-9</li> <li>- Moderate: 10-13</li> <li>- Severe: 14-17</li> <li>- Very severe: 18 to 21</li> </ul> </li> </ul> | Interval<br><br>Ordinal<br><br>Ordinal<br><br>Ordinal |
